# Supplementary material for: Role of Nuclear Factor of Activated T Cells (NFAT) Pathway in Regulating Autophagy and Inflammation in Retinal Pigment Epithelial Cells
Source: MDPI journal article supplement (doi:10.3390/ijms22168684), 2021-08-12
Supplement: s1 [file s1]

## Supplementary Material

Table S1

| Antibodies                         | Application           | Vendor                               |
|------------------------------------|-----------------------|--------------------------------------|
| Transcription factor EB            | WB: 1:500 IF :100     | Proteintech                          |
| anti-LC3 antibody                  | WB: 1:1000 IF 1:500   | MBL International                    |
| anti-SQSTM1/p62 antibody           | WB: 1:10000 IF: 1:400 | Abcam                                |
| anti- $\beta$ -Actin antibody      | WB: 1:2000            | Sigma                                |
| 4EBP-1 antibody                    | WB: 1:1000            | Cell signaling technology            |
| Phospho-4EBP-1 antibody            | WB: 1:1000            | Cell signaling technology            |
| p70S6K antibody                    | WB: 1:1000            | Cell signaling technology            |
| Phospho-p70S6K antibody            | WB: 1:1000            | Cell signaling technology            |
| AKT antibody                       | WB: 1:1000            | Cell signaling technology            |
| Phospho-AKT antibody               | WB: 1:1000            | Cell signaling technology            |
| LAMP-1 antibody                    | WB: 1:1000            | Cell signaling technology            |
| NFAT1 (Anti-NFATc2 Antibody)       | WB: 1:200             | Santa Cruz Biotechnology, Inc.       |
| NFAT2 (NFATC1 Monoclonal Antibody) | WB: 1:2,000           | Invitrogen (ThermoFisher Scientific) |
| NFAT3 (Anti-NFATc4 Antibody)       | WB: 1:100             | Santa Cruz Biotechnology, Inc.       |
| NFAT4 (Anti-NFATc3 Antibody)       | WB: 1:200             | Santa Cruz Biotechnology, Inc.       |
| RPE65 antibody                     | WB: 1:100             | Santa Cruz Biotechnology, Inc.       |

Table S2

| Human Primer     | Sequence                   |
|------------------|----------------------------|
| TFEB-R           | CGTCCAGACGCATAATGTTGTC     |
| TFEB-F           | ACCTGTCCGAGACCTATGGG       |
| LAMP-1-R         | TGTTCTCGTCCAGCAGACAC       |
| LAMP-1-F         | CTGCCTTTAAAGCTGCCAAC       |
| CTSD-R           | CCCGAGCCATAGTGGATGT        |
| CTSD-F           | CACCACAAGTACAACAGCGAC      |
| MCON1-R          | AACTCGTTCTGCAGCAGGAAGC     |
| MCON1-F          | TCTTCCAGCACGGAGACAAC       |
| LC3-R            | AGATTGGTGTGGAGACGCTG       |
| LC3-F            | AGCAGCTTCCTGTTCTGGAT       |
| 18s-R            | AGTCGGCATCGTTTATGGTC       |
| 18s-F            | CGCGGTTCTATTTTGTGTT        |
| IL-6-R           | GTCAGGGGTGGTTATTGCAT       |
| IL-6-F           | GGAGACTTGCCCTGGTGAAAA      |
| IL-8-R           | GGTGGAAGGTTTGGAGTATGTCTT   |
| IL-8-F           | CTTCCTGATTTCTGCAGCTCTGT    |
| NFAT1-R          | CGTTTTCTCTTCCCATTGATGAC    |
| NFAT1-F          | AAGAGCCAGCCCAACATGC        |
| NFAT2-R          | ACTGACGTGAACGGGGCTGG       |
| NFAT2-F          | CTGTGCAAGCCGAATTCTCTGG     |
| NFAT3-R          | AGCGTCACCTCGTTGCTCTGC      |
| NFAT3-F          | GTCCTGATGGGAAGCTGCAATGG    |
| NFAT4-R          | TGATGTGGTAAGCAAAGTGGTGTGGT |
| NFAT4-F          | GCGGCCTGCAGATCTTGAGC       |
| Mouse Primer     | Sequence                   |
| $\beta$ -actin-R | ACCAGAGGCATACAGGGACA       |
| $\beta$ -actin-F | CTAAGGCCAACCGTGAAAAG       |
| P62-R            | GCCAAAGTGTCCATGTTTCA       |
| P62-F            | AGGGAACACAGCAAGCT          |
| $\beta$ -actin   | Mm02619580_g1 Taqman probe |
| TFEB             | Mm00448968_m1 Taqman probe |
| LC3              | Mm00782868_sH Taqman probe |
| LAMP-1           | Mm00495262_m1 Taqman probe |
